# Supplementary material for: Ultrahigh energy harvesting properties in textured lead-free piezoelectric composites
Source: Royal Society of Chemistry journal article supplement (doi:10.1039/c8ta10312g), 2018-12-03
Supplement: c8ta10312g1.pdf [file c8ta10312g1.pdf]

## Supporting information

### Ultrahigh energy harvesting properties in textured lead-free piezoelectric composites

Yuan Sun,<sup>a</sup> Yunfei Chang,<sup>\*a</sup> Jie Wu,<sup>a</sup> Yingchun Liu,<sup>a</sup> Li Jin,<sup>\*b</sup> Shantao Zhang,<sup>c</sup> Bin Yang,<sup>a</sup>  
Wenwu Cao<sup>\*a, d</sup>

<sup>a</sup> Condensed Matter Science and Technology Institute, School of Science, Harbin Institute of Technology, Harbin 150080, China.

Email: changyunfei@hit.edu.cn

<sup>b</sup> Electronic Materials Research Laboratory, Key Laboratory of the Ministry of Education, Xi'an Jiaotong University, Xi'an 710049, China. Email: ljin@mail.xjtu.edu.cn

<sup>c</sup> National Laboratory of Solid State Microstructures and Department of Materials Science and Engineering, Nanjing University, Nanjing 210093, China

<sup>d</sup> Materials Research Institute and Department of Mathematics, The Pennsylvania State University, University Park, PA 16802, USA.

Email: dzk@psu.edu

### **Synthesis of 0.94(Ba<sub>0.979</sub>Ca<sub>0.021</sub>)(Ti<sub>0.957</sub>Sn<sub>0.043</sub>)O<sub>3</sub>-0.06BaTiO<sub>3</sub> control samples**

Randomly oriented 0.94(Ba<sub>0.979</sub>Ca<sub>0.021</sub>)(Ti<sub>0.957</sub>Sn<sub>0.043</sub>)O<sub>3</sub>-0.06BaTiO<sub>3</sub> (0.94BCTS-0.06BT) ceramics were prepared by conventional mixed-oxide method using BaCO<sub>3</sub> (99.95%), CaCO<sub>3</sub> (99.99%), nano-TiO<sub>2</sub> (99.8%), and nano-SnO<sub>2</sub> (99.9%) raw materials. The raw materials were weighed according to the stoichiometry of 0.94BCTS-0.06BT, and then ball-milled for 96 h in ethanol. The dried powder mixture was calcined at 1200 °C for 3 h and then tape cast using a nonaqueous formulation.<sup>1</sup> Dried green tapes were diced, stacked and laminated under 20 MPa and 75 °C to fabricate green compacts. After binder burnout at 600 °C and cold-isostatic pressing at 200 MPa, samples were heated at 5 °C/min to 1450 °C and then held for 4 h.

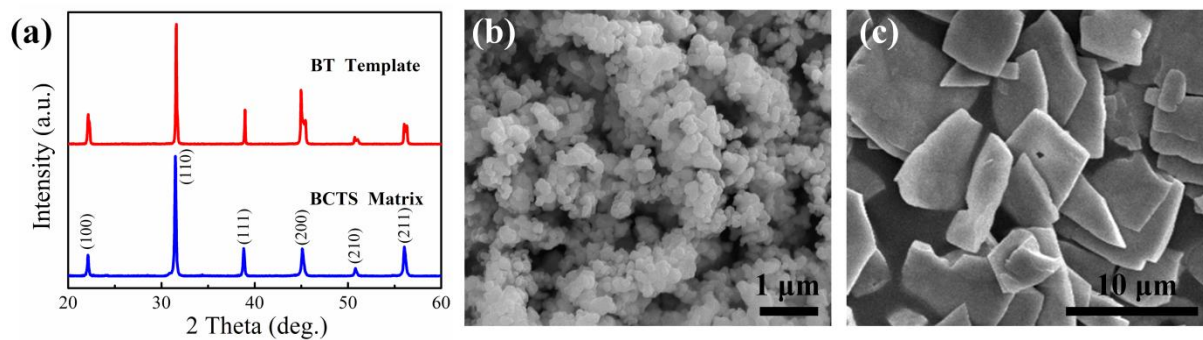

Fig. S1 (a) XRD patterns and (b, c) SEM images of BCTS matrix powder and BT microplatelet template particles.

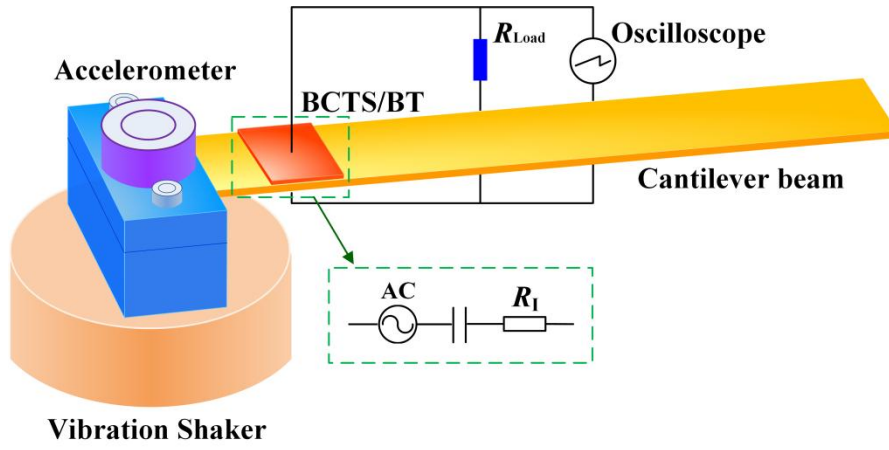

Fig. S2 Schematic diagrams of cantilever-type energy harvester and test system with load resistance.

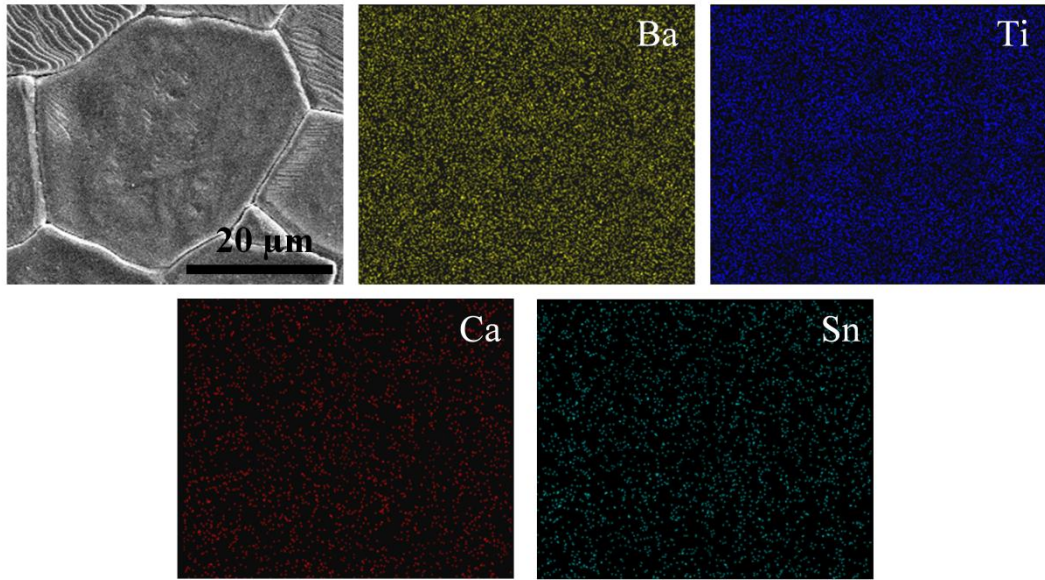

Fig. S3 Element distributions (Ba, Ca, Ti and Sn) of 0.94BCTS-0.06BT ceramics.

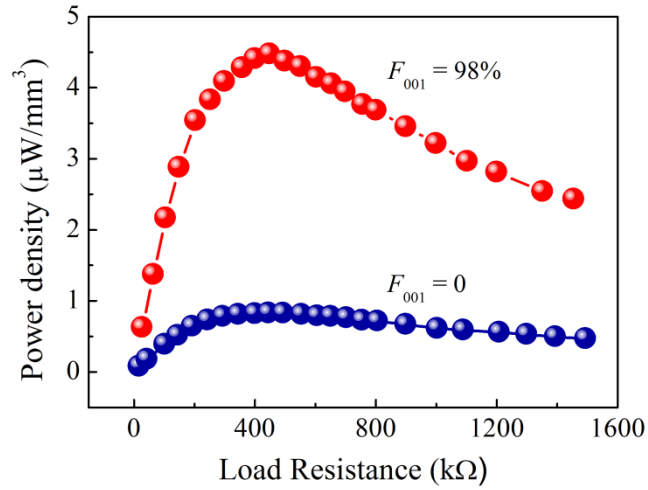

Fig. S4 Output power density as a function of load resistance for non-textured counterpart and textured BCTS/BT energy harvesters at 1 g acceleration. According to the schematic diagram of the equivalent circuit with load resistance  $R_{Load}$  (Fig. S2), there is an optimum  $R_{Load}$  value that matches with internal impedance  $R_1$  of the harvester, resulting in the maximum output power density. Here the optimum  $R_{Load}$  value was found to be 450 kΩ for both non-textured and textured energy harvesters.

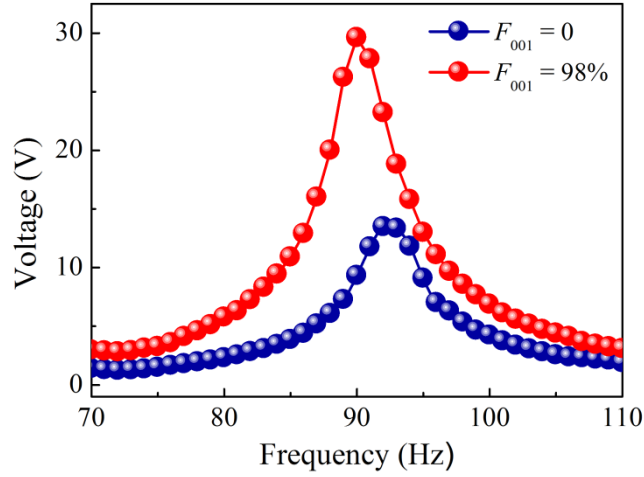

Fig. S5 Open circuit peak-to-peak voltage ( $V_{oc}$ ) as a function of frequency for non-textured counterpart and textured BCTS/BT energy harvesters at 1 g acceleration. The  $V_{oc}$  value shows a strong frequency dependence, and the maximum  $V_{oc}$  occurs at the resonance frequency of the cantilever beam, at which maximum strain on the piezoelectric samples can be generated. Here the resonance frequencies were found to be 92 Hz and 90 Hz for the non-textured and textured energy harvesters, respectively.

## Reference

1. Y. F. Chang, S. F. Poterala, Z. P. Yang, S. Trolier-McKinstry and G. L. Messing, *Appl. Phys. Lett.*, 2009, **95**, 232905.
